# Supplementary material for: Cyclic Electron Flow-Coupled Proton Pumping in Synechocystis sp. PCC6803 Is Dependent upon NADPH Oxidation by the Soluble Isoform of Ferredoxin:NADP-Oxidoreductase
Source: MDPI journal article supplement (doi:10.3390/microorganisms10050855), 2022-04-21
Supplement: s1 [file s1]

## $\Delta$ pH Formation

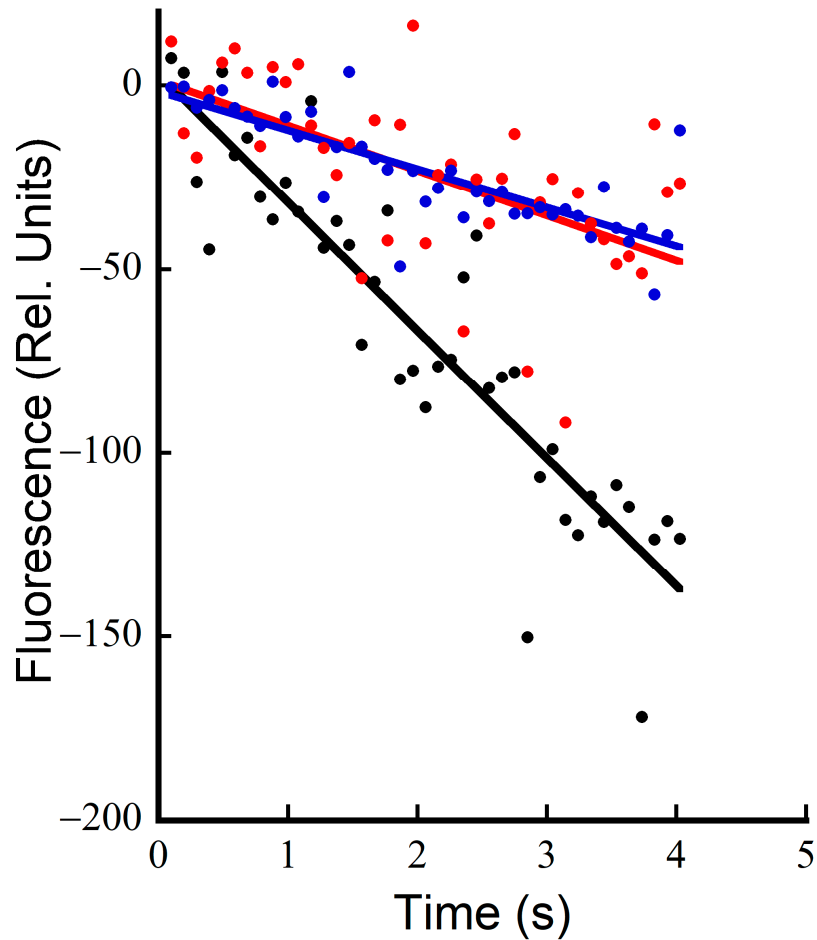

**Supplementary Figure S1. Dependence of proton pumping rate on sodium gradient.** WT cells in a sodium-containing buffer when treated with the sodium gradient disruptor monensin have acridine orange fluorescence quenching rates similar to cells in a buffer lacking sodium. Acridine orange fluorescence of dark-adapted WT cells in the JTS-100 in response to the presence of monensin in TCN buffer. Cells were dark adapted with acridine orange (5 $\mu$ M) for 20 min in either TCN buffer (black, red) or TCK buffer (blue). For samples in TCN buffer, a sample was prepared with KCl (150mM) plus Val (10 $\mu$ M), DCCD (500 $\mu$ M), and KCN (200 $\mu$ M) and stirred in the dark for 5 min (black trace) or with the addition of 50 $\mu$ M monensin (red). A sample in TCK buffer with the addition of Val (10 $\mu$ M), DCCD (500 $\mu$ M), and KCN (200 $\mu$ M) was otherwise treated the same as the black trace (blue trace).
